# Supplementary material for: Assessing the utility of large language models for phenotype-driven gene prioritization in the diagnosis of rare genetic disease
Source: PubMed Central journal article supplement (PMC11480789; doi:10.1016/j.ajhg.2024.08.010), 2024-09-09
Supplement: mmc1.pdf [file mmc1.pdf]

**The American Journal of Human Genetics, Volume 111**

**Supplemental information**

**Assessing the utility of large language models  
for phenotype-driven gene prioritization in the  
diagnosis of rare genetic disease**

**Junyoung Kim, Kai Wang, Chunhua Weng, and Cong Liu**

## Supplemental Figures

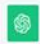

I'm not a medical professional, and providing a list of possible genes to test for a specific phenotype is a complex task that requires expertise in genetics and a detailed analysis of the patient's medical history, family history, and genetic testing results. Additionally, the list of genes to test can vary depending on the specific clinical presentation and other factors.

It's important to consult with a medical geneticist or genetic counselor who can perform a thorough evaluation of the patient's case, including any available family history and genetic testing data, to provide a tailored list of genes for testing.

I cannot provide a list of genes for testing as a language model, as it requires access to specific patient information and expertise beyond my capabilities. Please seek professional medical advice for a comprehensive evaluation and genetic testing recommendations.

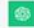

To identify the top 10 correlated genes based on the given phenotype terms, we can utilize the knowledge trained on the GPT-3.5 model. However, it's important to note that GPT-3.5 is a language model and not specifically designed for gene expression analysis or prediction. Therefore, the results provided should be considered as hypothetical and not based on real-time data or clinical expertise. Additionally, without a description or specific disease context, the correlation analysis may not accurately reflect the underlying genetic factors.

Nevertheless, based on the information provided, here are ten hypothetical genes that could be associated with the given phenotype terms:

1. GENE1
2. GENE2
3. GENE3
4. GENE4
5. GENE5
6. GENE6
7. GENE7
8. GENE8
9. GENE9
10. GENE10

**Figure S1. Examples illustrate two instances of GPT responses where the tasks were incomplete. Examples were shown using the ChatGPT user interface. In the left panel, GPT declines to provide prediction results. In the right panel, GPT-3.5 fabricates prediction genes as “GENE 1”, “GENE 2”, and “GENE 3”.**

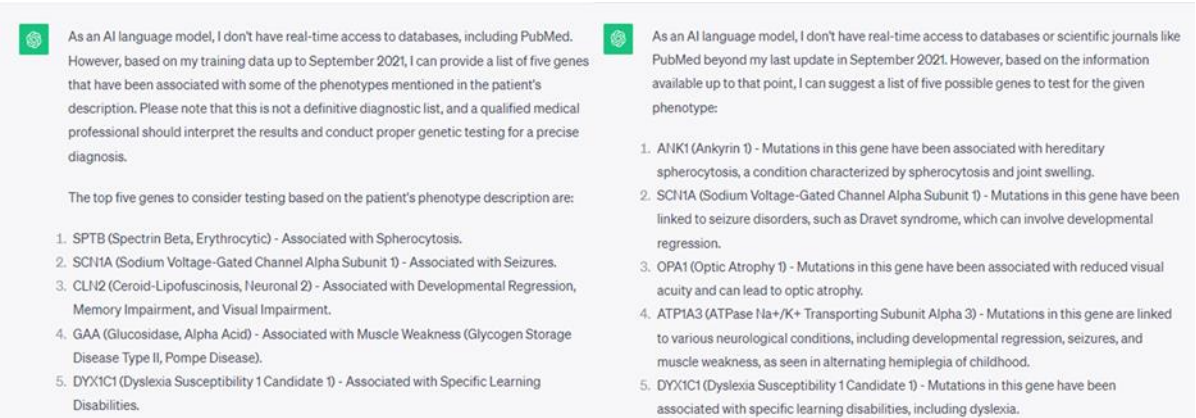

**Figure S2. Examples of two instances of GPT responses indicating the correct or incorrect gene prediction for an individual whose final diagnosed gene is *ANK1*. Examples were shown using the ChatGPT user interface. In the left panel, *ANK1* is not present, indicating a wrong prediction. In the right panel, GPT provided a gene list containing *ANK1*, indicating a correct prediction.**

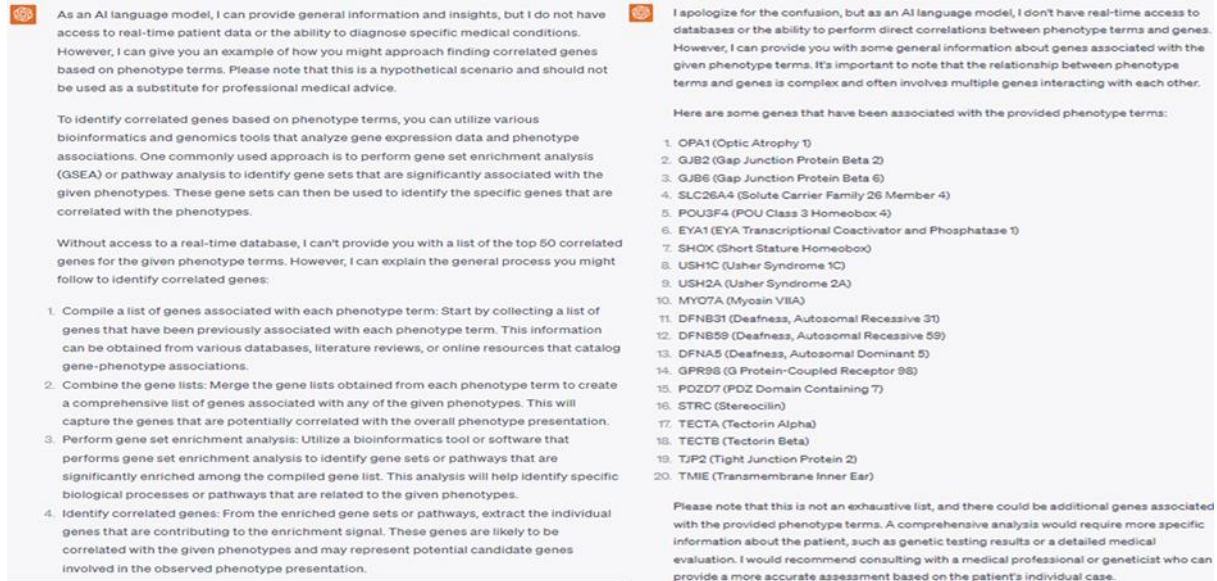

**Figure S3. Examples of two instances of GPT responses that do not adhere to the required output structure. Examples were shown using the ChatGPT user interface. In the left panel, GPT did not provide a gene list nor 'Not Applicable' explicitly. In the right panel, although GPT generated a gene list, the format did not align with the required comma-separated gene list. A compliant result should consist of a gene list with the exact number of genes requested in the prompt, such as [*OPA1*, *GJB2*, *GJB6*, ...], or generate 'Not Applicable'.**

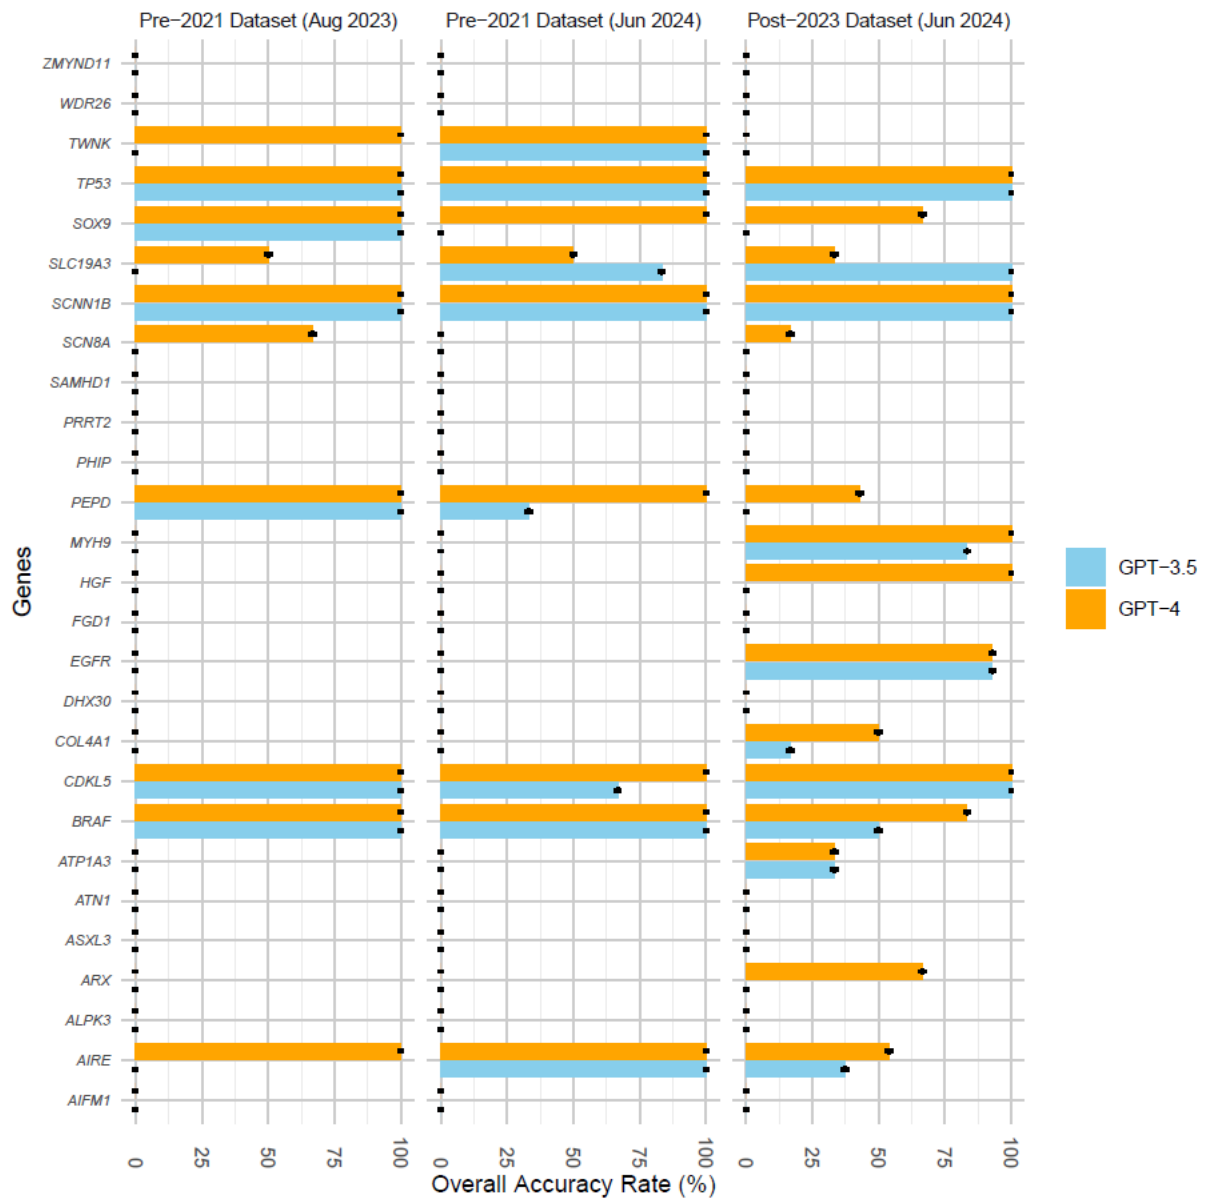

**Figure S4. Overall accuracy rate for GPT-3.5 and GPT-4 models across different datasets categorized by collection periods and gene types.** Overall accuracy rate performance for overlapping genes using datasets collected at various times. Error bars represent standard deviation. **BLUE:** GPT-3.5; **ORANGE:** GPT-4.

## Supplemental Tables

**Table S1. Bias analysis for the genes in the diagnosed pools across different models.** The odds ratio (OR) is calculated as  $\frac{O_i}{E_i}$ , where  $E_i$  is the expected count of responses with the gene  $i$  predicted, and  $O_i$  is the observed count of responses with the gene  $i$  predicted. Furthermore,  $E_i$  is calculated as the  $M \times \frac{k_i}{K}$ , where  $M = \sum_i O_i$  is the total count of (non-unique) genes that appeared in all responses,  $k_i$  is the count of responses should have predicted  $k_i$ , and  $K = \sum_i k_i$  is the total count of responses.  $M$  and  $K$  are the same for all genes in a single LLM model. A high odds ratio indicates the LLMs' high tendency to predict a certain gene.



**Table S2. Evaluation results of the LLM’s performance in making top 10 accurate gene predictions task.** The table shows the average accuracy rates with their 95% confidence intervals (CIs) based on a bootstrap approach with replacement over 100 iterations. The accuracy rates are calculated for various prompt types and input types.

| Factor     |                               | GPT-4  |                         | GPT-3.5 |                        | Llama2-7b-chat |                       | Llama2-13b-chat |                       | Llama2-70b-chat |                       |
|------------|-------------------------------|--------|-------------------------|---------|------------------------|----------------|-----------------------|-----------------|-----------------------|-----------------|-----------------------|
| Prompts    | Original                      | 13.63% | 95% CI: 10.01% - 15.90% | 2.24%   | 95% CI: 1.50% - 3.11%  | -              |                       | -               |                       | -               |                       |
|            | Original + Role               | 14.13% | 95% CI: 12.56% - 16.31% | 4.49%   | 95% CI: 3.14% - 5.60%  | -              |                       | -               |                       | -               |                       |
|            | Original + Instruction        | 14.13% | 95% CI: 11.83% - 16.23% | 8.56%   | 95% CI: 6.24% - 10.13% | -              |                       | -               |                       | -               |                       |
|            | Original + Role + Instruction | 13.88% | 95% CI: 11.41% - 15.66% | 10.14%  | 95% CI: 8.42% - 11.90% | 4.66%          | 95% CI: 3.61% - 5.81% | 6.57%           | 95% CI: 5.26% - 7.99% | 6.15%           | 95% CI: 4.82% - 7.19% |
| Input Type | HPO Concept                   | 14.89% | 95% CI: 13.82% - 16.09% | 6.19%   | 95% CI: 5.24% - 6.98%  | 4.71%          | 95% CI: 3.14% - 6.27% | 6.64%           | 95% CI: 5.06% - 8.10% | 7.13%           | 95% CI: 4.92% - 8.82% |
|            | Free Text                     | 11.87% | 95% CI: 9.74% - 13.94%  | 6.73%   | 95% CI: 5.19% - 8.03%  | 4.53%          | 95% CI: 2.18% - 6.54% | 6.40%           | 95% CI: 3.79% - 8.52% | 4.00%           | 95% CI: 1.89% - 5.98% |

**Table S3. Evaluation results of the LLM’s performance in making top 10 accurate gene predictions task among completed experiments.** The table shows the average accuracy rates with their 95% confidence intervals (CIs) based on a bootstrap approach with replacement over 100 iterations. The accuracy rates are calculated for various prompt types and input types.

| Factor     |                               | GPT-4   |                           | GPT-3.5 |                         | Llama2-7b-chat |                         | Llama2-13b-chat |                         | Llama2-70b-chat |                         |
|------------|-------------------------------|---------|---------------------------|---------|-------------------------|----------------|-------------------------|-----------------|-------------------------|-----------------|-------------------------|
| Prompts    | Original                      | 13.83 % | 95% CI: 11.88% - 16.04 %  | 7.20%   | 95% CI: 4.72% - 9.62%   | -              |                         | -               |                         | -               |                         |
|            | Original + Role               | 14.51 % | 95% CI: 12.44 % - 16.66 % | 7.16%   | 95% CI: 5.22% - 8.87%   | -              |                         | -               |                         | -               |                         |
|            | Original + Instruction        | 14.17 % | 95% CI: 11.65% - 15.94 %  | 10.45 % | 95% CI: 8.66% - 12.35 % | -              |                         | -               |                         | -               |                         |
|            | Original + Role + Instruction | 13.93 % | 95% CI: 12.02 % - 15.80 % | 10.21 % | 95% CI: 8.34% - 11.84%  | 5.34 %         | 95% CI: 3.91 % - 6.91 % | 7.15 %          | 95% CI: 5.46 % - 8.53 % | 7.46 %          | 95% CI: 5.66% - 9.15%   |
| Input Type | HPO Concept                   | 15.06 % | 95% CI: 13.64 % - 16.33 % | 9.53%   | 95% CI: 8.3% - 10.81 %  | 5.41 %         | 95% CI: 3.52 % - 6.96 % | 7.41 %          | 95% CI: 5.63 % - 9.25 % | 8.21 %          | 95% CI: 5.92% - 10.06 % |
|            | Free Text                     | 12.00 % | 95% CI: 10.33 % - 13.38 % | 8.71%   | 95% CI: 6.82% - 10.22 % | 5.20 %         | 95% CI: 2.44 % - 8.03 % | 6.61 %          | 95% CI: 3.97 % - 8.83 % | 5.49 %          | 95% CI: 1.48% - 8.05%   |

**Table S4. Evaluation results of the LLM’s performance in making top 50 accurate gene predictions task.** The table shows the average accuracy rates with their 95% confidence intervals (CIs) based on a bootstrap approach with replacement over 100 iterations. The accuracy rates are calculated for various prompt types and input types.

| Factor     |                               | GPT-4  |                                  | GPT-3.5 |                                  | Llama2-7b-chat |                                | Llama2-13b-chat |                                | Llama2-70b-chat |                                |
|------------|-------------------------------|--------|----------------------------------|---------|----------------------------------|----------------|--------------------------------|-----------------|--------------------------------|-----------------|--------------------------------|
| Prompts    | Original                      | 15.46% | 95% CI:<br>12.87%<br>-<br>17.64% | 2.41%   | 95% CI:<br>1.64%<br>-<br>3.55%   | -              |                                | -               |                                | -               |                                |
|            | Original + Role               | 16.38% | 95% CI:<br>13.37%<br>-<br>18.17% | 10.89%  | 95% CI:<br>8.90%<br>-<br>12.79%  | -              |                                | -               |                                | -               |                                |
|            | Original + Instruction        | 15.71% | 95% CI:<br>13.31%<br>-<br>17.64% | 11.31%  | 95% CI:<br>9.52%<br>-<br>13.20%  | -              |                                | -               |                                | -               |                                |
|            | Original + Role + Instruction | 17.04% | 95% CI:<br>14.89%<br>-<br>19.21% | 15.30%  | 95% CI:<br>13.00%<br>-<br>16.85% | 2.58%          | 95% CI:<br>1.75%<br>-<br>3.45% | 4.66%           | 95% CI:<br>3.61%<br>-<br>6.02% | 6.65%           | 95% CI:<br>5.09%<br>-<br>8.01% |
| Input Type | HPO Concept                   | 18.18% | 95% CI:<br>17.21%<br>-<br>19.60% | 10.84%  | 95% CI:<br>9.57%<br>-<br>11.96%  | 3.02%          | 95% CI:<br>1.86%<br>-<br>3.98% | 5.68%           | 95% CI:<br>3.97%<br>-<br>7.41% | 7.61%           | 95% CI:<br>5.24%<br>-<br>9.47% |
|            | Free Text                     | 11.67% | 95% CI:<br>9.72%<br>-<br>12.98%  | 8.07%   | 95% CI:<br>6.63%<br>-<br>9.58%   | 1.60%          | 95% CI:<br>0.16%<br>-<br>2.93% | 2.40%           | 95% CI:<br>1.32%<br>-<br>3.98% | 4.53%           | 95% CI:<br>1.88%<br>-<br>6.62% |

**Table S5. Evaluation results of the LLM’s performance in making top 50 accurate gene predictions task among completed experiments.** The table shows the average accuracy rates with their 95% confidence intervals (CIs) based on a bootstrap approach with replacement over 100 iterations. The accuracy rates are calculated for various prompt types and input types.

| Factor     |                               | GPT-4  |                         | GPT-3.5 |                         | Llama2-7b-chat |                       | Llama2-13b-chat |                         | Llama2-70b-chat |                        |
|------------|-------------------------------|--------|-------------------------|---------|-------------------------|----------------|-----------------------|-----------------|-------------------------|-----------------|------------------------|
| Prompts    | Original                      | 17.87% | 95% CI: 15.25% - 19.69% | 15.93%  | 95% CI: 10.40% - 20.83% | -              | -                     | -               | -                       | -               | -                      |
|            | Original + Role               | 20.06% | 95% CI: 17.01% - 22.74% | 16.09%  | 95% CI: 13.26% - 19.30% | -              | -                     | -               | -                       | -               | -                      |
|            | Original + Instruction        | 16.35% | 95% CI: 13.95% - 18.61% | 16.04%  | 95% CI: 12.96% - 18.57% | -              | -                     | -               | -                       | -               | -                      |
|            | Original + Role + Instruction | 18.11% | 95% CI: 15.79% - 20.87% | 17.28%  | 95% CI: 14.88% - 19.77% | 4.75%          | 95% CI: 2.75% - 6.40% | 8.66%           | 95% CI: 5.918% - 11.26% | 7.99%           | 95% CI: 6.23% - 9.82%  |
| Input Type | HPO Concept                   | 20.67% | 95% CI: 19.03% - 22.24% | 17.87%  | 95% CI: 16.17% - 19.34% | 5.39%          | 95% CI: 3.43% - 7.36% | 10.88%          | 95% CI: 8.04% - 13.81%  | 9.09%           | 95% CI: 7.16% - 10.95% |
|            | Free Text                     | 12.52% | 95% CI: 9.95% - 14.15%  | 13.44%  | 95% CI: 10.70% - 15.92% | 3.17%          | 95% CI: 0.00% - 5.81% | 4.19%           | 95% CI: 1.86% - 6.51%   | 5.52%           | 95% CI: 2.53% - 8.42%  |

**Table S6. Evaluation results of LLMs’ performance in completing the task.** The table shows the average completeness rates with their 95% confidence intervals (CIs) based on a bootstrap approach with replacement over 100 iterations. The completeness rates are calculated for various prompt types, task levels and input types.

| Factor      |                               | GPT-4  |                         | GPT-3.5 |                         | Llama2-7b-chat |                         | Llama2-13b-chat |                         | Llama2-70b-chat |                         |
|-------------|-------------------------------|--------|-------------------------|---------|-------------------------|----------------|-------------------------|-----------------|-------------------------|-----------------|-------------------------|
| Prompts     | Original                      | 92.56% | 95% CI: 91.47% - 93.58% | 23.15%  | 95% CI: 20.96% - 24.78% | -              | -                       | -               | -                       | -               | -                       |
|             | Original + Role               | 89.53% | 95% CI: 88.30% - 90.80% | 65.17%  | 95% CI: 62.95% - 67.00% | -              | -                       | -               | -                       | -               | -                       |
|             | Original + Instruction        | 97.92% | 95% CI: 97.40% - 98.55% | 76.23%  | 95% CI: 74.52% - 78.30% | -              | -                       | -               | -                       | -               | -                       |
|             | Original + Role + Instruction | 96.88% | 95% CI: 96.07% - 97.52% | 93.93%  | 95% CI: 93.14% - 94.87% | 70.70%         | 95% CI: 68.65% - 72.41% | 72.82%          | 95% CI: 71.20% - 75.03% | 82.83%          | 95% CI: 81.31% - 84.34% |
| Task levels | Top 10                        | 98.86% | 95% CI: 98.55% - 99.11% | 68.79%  | 95% CI: 67.53% - 70.37% | 87.12%         | 95% CI: 85.39% - 88.48% | 91.85%          | 95% CI: 90.31% - 93.22% | 82.46%          | 95% CI: 80.50% - 84.26% |
|             | Top 50                        | 89.59% | 95% CI: 88.59% - 90.36% | 60.45%  | 95% CI: 59.32% - 62.11% | 54.28%         | 95% CI: 51.26% - 57.08% | 53.78%          | 95% CI: 50.29% - 57.00% | 83.21%          | 95% CI: 81.49% - 85.29% |
| Input Type  | HPO Concept                   | 93.40% | 95% CI: 92.96% - 93.99% | 62.79%  | 95% CI: 61.59% - 64.04% | 71.56%         | 95% CI: 69.48% - 73.41% | 70.89%          | 95% CI: 68.41% - 73.07% | 85.27%          | 95% CI: 83.40% - 87.08% |
|             | Free Text                     | 96.03% | 95% CI: 95.38% - 96.65% | 68.67%  | 95% CI: 66.78% - 69.93% | 68.80%         | 95% CI: 64.40% - 72.99% | 77.07%          | 95% CI: 73.68% - 80.17% | 77.47%          | 95% CI: 74.62% - 81.45% |

**Table S7. Evaluation results of LLM’s performance in producing results adhering to the required output structure format.** The table shows the average structural compliance rates with their 95% confidence intervals (CIs) based on a bootstrap approach with replacement over 100 iterations. The structural compliance rates are calculated for various prompt types, task levels and input types.

| Factor      |                               | GPT-4  |                          | GPT-3.5 |                         | Llama2-7b-chat |                       | Llama2-13b-chat |                       | Llama2-70b-chat |                       |
|-------------|-------------------------------|--------|--------------------------|---------|-------------------------|----------------|-----------------------|-----------------|-----------------------|-----------------|-----------------------|
| Prompts     | Original                      | 77.64% | 95% CI: 75.70% - 79.39%  | 62.97%  | 95% CI: 60.72% - 65.22% | -              | -                     | -               | -                     | -               | -                     |
|             | Original + Role               | 80.71% | 95% CI: 79.21% - 82.02%  | 30.59%  | 95% CI: 29.08% - 32.40% | -              | -                     | -               | -                     | -               | -                     |
|             | Original + Instruction        | 79.76% | 95% CI: 77.86% - 81.91%  | 15.46%  | 95% CI: 13.81% - 16.88% | -              | -                     | -               | -                     | -               | -                     |
|             | Original + Role + Instruction | 79.01% | 95% CI: 77.48% - 80.95%  | 0.25%   | 95% CI: 0.00% - 0.48%   | 0.46%          | 95% CI: 0.07% - 0.64% | 1.00%           | 95% CI: 0.54% - 1.42% | 0.25%           | 95% CI: 0.00% - 0.42% |
| Task levels | Top 10                        | 99.98% | 95% CI: 99.96% - 100.00% | 31.17%  | 95% CI: 29.63% - 32.42% | 0.08%          | 95% CI: 0.00% - 0.17% | 0.25%           | 95% CI: 0.00% - 0.50% | 0.17%           | 95% CI: 0.00% - 0.33% |
|             | Top 50                        | 58.58% | 95% CI: 57.28% - 60.27%  | 23.46%  | 95% CI: 22.32% - 24.65% | 0.83%          | 95% CI: 0.24% - 1.26% | 1.75%           | 95% CI: 0.93% - 2.51% | 0.33%           | 95% CI: 0.00% - 0.67% |
| Input Type  | HPO Concept                   | 80.01% | 95% CI: 79.00% - 80.83%  | 30.15%  | 95% CI: 29.08% - 31.26% | 0.48%          | 95% CI: 0.15% - 0.76% | 1.03%           | 95% CI: 0.40% - 1.45% | 0.18%           | 95% CI: 0.00% - 0.36% |
|             | Free Text                     | 77.67% | 95% CI: 76.20% - 78.99%  | 21.07%  | 95% CI: 19.75% - 22.56% | 0.40%          | 95% CI: 0.00% - 0.80% | 0.93%           | 95% CI: 0.07% - 1.47% | 0.40%           | 95% CI: 0.00% - 0.80% |

**Table S8. Average performance and standard deviation across different factor combinations.** Detailed metric calculations are subdivided by each factor combination, including LLM models, input types, prompts, and task difficulties.

**Table S9. Variability in overall accuracy difference ratios across different factor combinations.** The stability analysis of LLMs was subdivided by each factor combination, including LLM models, input types, prompts, and task difficulties.



**Table S10. Variability in task completeness difference ratios across different factor combinations.** The stability analysis of LLMs was subdivided by each factor combination, including LLM models, input types, prompts, and task difficulties.

**Table S11. Variability in structural compliance ratios across different factor combinations.**  
The stability analysis of LLMs was subdivided by each factor combination, including LLM models, input types, prompts, and task difficulties.
